# Supplementary material for: Crystallographic, optical and dielectric properties of gel grown praseodymium malonate single crystals
Source: Royal Society of Chemistry journal article supplement (doi:10.1039/c5ra09502f), 2015-01-01
Supplement: c5ra09502f1.pdf [file c5ra09502f1.pdf]

Attachments as ESI of the manuscript entitled “Crystallographic, optical and dielectric properties of gel grown Praseodymium malonate single crystals”.

*Nazir Ahmad<sup>1</sup>, M .M. Ahmad<sup>1</sup>, P. N. Kotru<sup>\*2</sup>*

Table 3 (a).

Crystallographic data of Pr (C<sub>3</sub>H<sub>2</sub>O<sub>4</sub>)<sub>3</sub> (H<sub>2</sub>O)<sub>6</sub>.

|                                 |                                                                            |
|---------------------------------|----------------------------------------------------------------------------|
| Empirical formula               | C <sub>9</sub> H <sub>18</sub> O <sub>18</sub> Pr <sub>2</sub>             |
| Formula weight                  | 685.97                                                                     |
| Temperature                     | 296(2) K                                                                   |
| Wavelength                      | 0.71073 Å                                                                  |
| Crystal system                  | Monoclinic                                                                 |
| Space group                     | P2/m                                                                       |
| Unit cell dimensions            | a = 15.107(9) Å<br>b = 11.976(5) Å<br>c = 10.343(7) Å<br>$\beta = 121.508$ |
| Volume                          | 1871.2704(2) Å <sup>3</sup>                                                |
| Z                               | 4                                                                          |
| Calculated density              | 2.379 Mg/m <sup>3</sup>                                                    |
| Absorption coefficient          | 5.115 mm <sup>-1</sup>                                                     |
| F <sub>000</sub>                | 1296                                                                       |
| Crystal size                    | 0.35 x 0.30 x 0.25 mm                                                      |
| Theta range for data collection | 2.97 to 28.21 deg.                                                         |

|                                      |                                             |
|--------------------------------------|---------------------------------------------|
| Index ranges                         | -21<=h<=22                                  |
|                                      | -16<=k<=16                                  |
|                                      | -14<=l<=9                                   |
| Reflections collected / unique       | 7511 / 2349 [R(int) = 0.0416]               |
| Completeness to theta =              | 28.21 99.4 %                                |
| Max. and min. transmission           | 0.3612 and 0.2676                           |
| Refinement method                    | Full-matrix least-squares on F <sup>2</sup> |
| Data / restraints / parameters       | 2349/6 /149                                 |
| Goodness-of-fit on F <sup>2</sup>    | 1.116                                       |
| Final R indices [ $I > 2\sigma(I)$ ] | R1 = 0.0224, wR2 = 0.0588                   |
| R indices (all data)                 | R1 = 0.0235, wR2 = 0.0597                   |
| Extinction coefficient               | 0.00297(13)                                 |
| Largest diff. peak and hole          | 1.048 and -0.882 e.A <sup>-3</sup>          |

---

Table 3 (b).

Atomic coordination and equivalent thermal parameters.

| Atoms | x       | y        | z        | Ueq   |
|-------|---------|----------|----------|-------|
| C(1)  | 1386(2) | 2109(2)  | 3323(3)  | 19(1) |
| C(2)  | 1184(3) | 3278(3)  | 2801(4)  | 25(1) |
| C(3)  | 4256(2) | 2001(2)  | 1250(3)  | 17(1) |
| C(4)  | 5000    | 1251(4)  | 2500     | 20(1) |
| C(5)  | 3127(2) | -1178(2) | 2419(3)  | 19(1) |
| O(1)  | 1625(2) | 1445(2)  | 2741(3)  | 26(1) |
| O(2)  | 1278(2) | 1847(2)  | 4277(3)  | 34(1) |
| O(3)  | 3417(2) | 2092(2)  | 916(2)   | 20(1) |
| O(4)  | 4507(2) | 2563(2)  | 608(3)   | 27(1) |
| O(5)  | 3756(2) | 1792(2)  | 3844(3)  | 29(1) |
| O(6)  | 1821(3) | 628(2)   | -1134(4) | 41(1) |
| O(7)  | 830(2)  | 26(2)    | 34(5)    | 55(1) |
| O(8)  | 3003(2) | -189(2)  | 2149(3)  | 34(1) |
| O(9)  | 2751(2) | -1690(2) | 2905(3)  | 23(1) |
| Pr(1) | 2166(1) | 1469(1)  | 1199(1)  | 14(1) |

Table 3 (c)

Bond lengths (Å)

| Atom         | length   |
|--------------|----------|
| C(1)-O(2)    | 1.239(4) |
| C(1)-O(1)    | 1.267(4) |
| C(1)-C(2)    | 1.525(4) |
| C(2)-C(5)#1  | 1.515(4) |
| C(3)-O(4)    | 1.257(4) |
| C(3)-O(3)    | 1.262(3) |
| C(3)-C(4)    | 1.516(4) |
| C(3)-Pr(1)#2 | 2.999(3) |
| C(4)-C(3)#3  | 1.516(4) |
| C(5)-O(9)    | 1.249(4) |
| C(5)-O(8)    | 1.252(4) |
| C(5)-C(2)#4  | 1.515(4) |
| O(1)-Pr(1)   | 2.420(2) |
| O(3)-Pr(1)   | 2.493(2) |
| O(3)-Pr(1)#2 | 2.636(2) |
| O(4)-Pr(1)#2 | 2.604(2) |

|              |          |
|--------------|----------|
| O(5)-Pr(1)   | 2.570(3) |
| O(6)-Pr(1)   | 2.534(3) |
| O(7)-Pr(1)   | 2.566(3) |
| O(8)-Pr(1)   | 2.366(2) |
| O(9)-Pr(1)#4 | 2.468(2) |
| Pr(1)-O(9)#1 | 2.468(2) |
| Pr(1)-O(4)#2 | 2.604(2) |
| Pr(1)-O(3)#2 | 2.636(2) |
| Pr(1)-C(3)#2 | 2.999(3) |

---

Table 3 (d).

## Bond angles (degree)

| Atoms             | Angle      |
|-------------------|------------|
| O(2)-C(1)-O(1)    | 123.0(3)   |
| O(2)-C(1)-C(2)    | 117.5(3)   |
| O(1)-C(1)-C(2)    | 119.5(3)   |
| C(5)#1-C(2)-C(1)  | 117.9(3)   |
| O(4)-C(3)-O(3)    | 121.1(3)   |
| O(4)-C(3)-C(4)    | 118.6(2)   |
| O(3)-C(3)-C(4)    | 120.2(2)   |
| O(4)-C(3)-Pr(1)#2 | 59.81(16)  |
| O(3)-C(3)-Pr(1)#2 | 61.29(15)  |
| C(4)-C(3)-Pr(1)#2 | 178.2(2)   |
| C(3)-C(4)-C(3)#3  | 104.1(3)   |
| O(9)-C(5)-O(8)    | 123.2(3)   |
| O(9)-C(5)-C(2)#4  | 121.1(3)   |
| O(8)-C(5)-C(2)#4  | 115.7(3)   |
| C(1)-O(1)-Pr(1)   | 138.67(19) |
| C(3)-O(3)-Pr(1)   | 149.7(2)   |
| C(3)-O(3)-Pr(1)#2 | 93.89(17)  |

|                    |           |
|--------------------|-----------|
| Pr(1)-O(3)-Pr(1)#2 | 116.15(8) |
| C(3)-O(4)-Pr(1)#2  | 95.53(18) |
| C(5)-O(8)-Pr(1)    | 158.6(2)  |
| C(5)-O(9)-Pr(1)#4  | 137.2(2)  |
| O(8)-Pr(1)-O(1)    | 93.61(8)  |
| O(8)-Pr(1)-O(9)#1  | 139.04(9) |
| O(1)-Pr(1)-O(9)#1  | 70.79(7)  |
| O(8)-Pr(1)-O(3)    | 89.30(8)  |
| O(1)-Pr(1)-O(3)    | 147.04(8) |
| O(9)#1-Pr(1)-O(3)  | 85.69(7)  |
| O(8)-Pr(1)-O(6)    | 78.58(10) |
| O(1)-Pr(1)-O(6)    | 141.85(9) |
| O(9)#1-Pr(1)-O(6)  | 136.30(9) |
| O(3)-Pr(1)-O(6)    | 70.82(8)  |
| O(8)-Pr(1)-O(7)    | 74.63(10) |
| O(1)-Pr(1)-O(7)    | 74.74(10) |
| O(9)#1-Pr(1)-O(7)  | 131.84(8) |
| O(3)-Pr(1)-O(7)    | 137.13(9) |
| O(6)-Pr(1)-O(7)    | 67.16(10) |
| O(8)-Pr(1)-O(5)    | 71.60(9)  |
| O(1)-Pr(1)-O(5)    | 77.31(9)  |
| O(9)#1-Pr(1)-O(5)  | 68.12(8)  |
| O(3)-Pr(1)-O(5)    | 72.52(8)  |

|                     |            |
|---------------------|------------|
| O(6)-Pr(1)-O(5)     | 132.38(9)  |
| O(7)-Pr(1)-O(5)     | 134.10(12) |
| O(8)-Pr(1)-O(4)#2   | 146.89(9)  |
| O(1)-Pr(1)-O(4)#2   | 80.47(8)   |
| O(9)#1-Pr(1)-O(4)#2 | 69.62(8)   |
| O(3)-Pr(1)-O(4)#2   | 113.27(7)  |
| O(6)-Pr(1)-O(4)#2   | 86.16(10)  |
| O(7)-Pr(1)-O(4)#2   | 72.38(10)  |
| O(5)-Pr(1)-O(4)#2   | 136.71(8)  |
| O(8)-Pr(1)-O(3)#2   | 142.24(8)  |
| O(1)-Pr(1)-O(3)#2   | 123.53(7)  |
| O(9)#1-Pr(1)-O(3)#2 | 68.57(7)   |
| O(3)-Pr(1)-O(3)#2   | 63.85(8)   |
| O(6)-Pr(1)-O(3)#2   | 68.05(8)   |
| O(7)-Pr(1)-O(3)#2   | 106.42(11) |
| O(5)-Pr(1)-O(3)#2   | 119.34(8)  |
| O(4)#2-Pr(1)-O(3)#2 | 49.48(6)   |
| O(8)-Pr(1)-C(3)#2   | 154.22(9)  |
| O(1)-Pr(1)-C(3)#2   | 101.97(8)  |
| O(9)#1-Pr(1)-C(3)#2 | 66.35(8)   |
| O(3)-Pr(1)-C(3)#2   | 88.62(7)   |
| O(6)-Pr(1)-C(3)#2   | 76.48(9)   |
| O(7)-Pr(1)-C(3)#2   | 89.69(11)  |



O(5)-Pr(1)-C(3)#2      131.65(8)

O(4)#2-Pr(1)-C(3)#2      24.66(7)

O(3)#2-Pr(1)-C(3)#2      24.83(7)

---

Symmetry transformations used to generate equivalent atoms:

# (1 -x+1/2, y+1/2,-z+1/2)    #2 (-x+1/2, -y+1/2,-z)

#3 (-x+1, y,-z+1/2) and    #4 (-x+1/2,y-1/2,-z+1/2)

Table 3(e).

Anisotropic displacement parameters ( $\text{Å}^2 \times 10^3$ ) for PMH

The anisotropic displacement factor exponent takes the form:

$$-2 \pi^2 [ h^2 a^{*2} U_{11} + \dots + 2 h k a^* b^* U_{12} ]$$

| Atoms | U11   | U22   | U33    | U23    | U13   | U12    |
|-------|-------|-------|--------|--------|-------|--------|
| C(1)  | 24(1) | 17(1) | 23(1)  | 0(1)   | 18(1) | 0(1)   |
| C(2)  | 39(2) | 16(1) | 37(2)  | 4(1)   | 32(2) | 5(1)   |
| C(3)  | 17(1) | 18(1) | 16(1)  | -3(1)  | 10(1) | -2(1)  |
| C(4)  | 15(2) | 19(2) | 19(2)  | 0      | 8(2)  | 0      |
| C(5)  | 25(1) | 14(1) | 17(1)  | 0(1)   | 12(1) | 1(1)   |
| O(1)  | 47(2) | 14(1) | 37(2)  | 1(1)   | 36(1) | 2(1)   |
| O(2)  | 62(2) | 24(1) | 40(2)  | 2(1)   | 44(2) | 2(1)   |
| O(3)  | 17(1) | 27(1) | 20(1)  | 3(1)   | 13(1) | 2(1)   |
| O(4)  | 21(1) | 36(1) | 27(1)  | 9(1)   | 16(1) | 2(1)   |
| O(5)  | 26(1) | 39(1) | 24(1)  | -8(1)  | 17(1) | 0(1)   |
| O(6)  | 79(2) | 22(1) | 56(2)  | -17(1) | 58(2) | -18(1) |
| O(7)  | 56(2) | 35(2) | 107(3) | -35(2) | 66(2) | -23(1) |
| O(8)  | 47(2) | 14(1) | 50(2)  | 7(1)   | 34(1) | 6(1)   |
| O(9)  | 33(1) | 17(1) | 28(1)  | 3(1)   | 24(1) | 4(1)   |
| Pr(1) | 20(1) | 11(1) | 19(1)  | 0(1)   | 15(1) | 0(1)   |

Table 3 (f).

Hydrogen coordinates ( $\times 10^4$ ) and isotropic displacement parameters ( $\text{Å}^2 \times 10^3$ ) for PMH.

| Atoms | x        | y        | z         | U(eq)  |
|-------|----------|----------|-----------|--------|
| H(5A) | 4180(30) | 2040(40) | 3790(70)  | 80(20) |
| H(5B) | 3680(40) | 2200(40) | 4360(60)  | 75(19) |
| H(6A) | 2090(40) | 900(40)  | -1500(60) | 69(18) |
| H(6B) | 1750(40) | -36(17)  | -1340(50) | 51(14) |

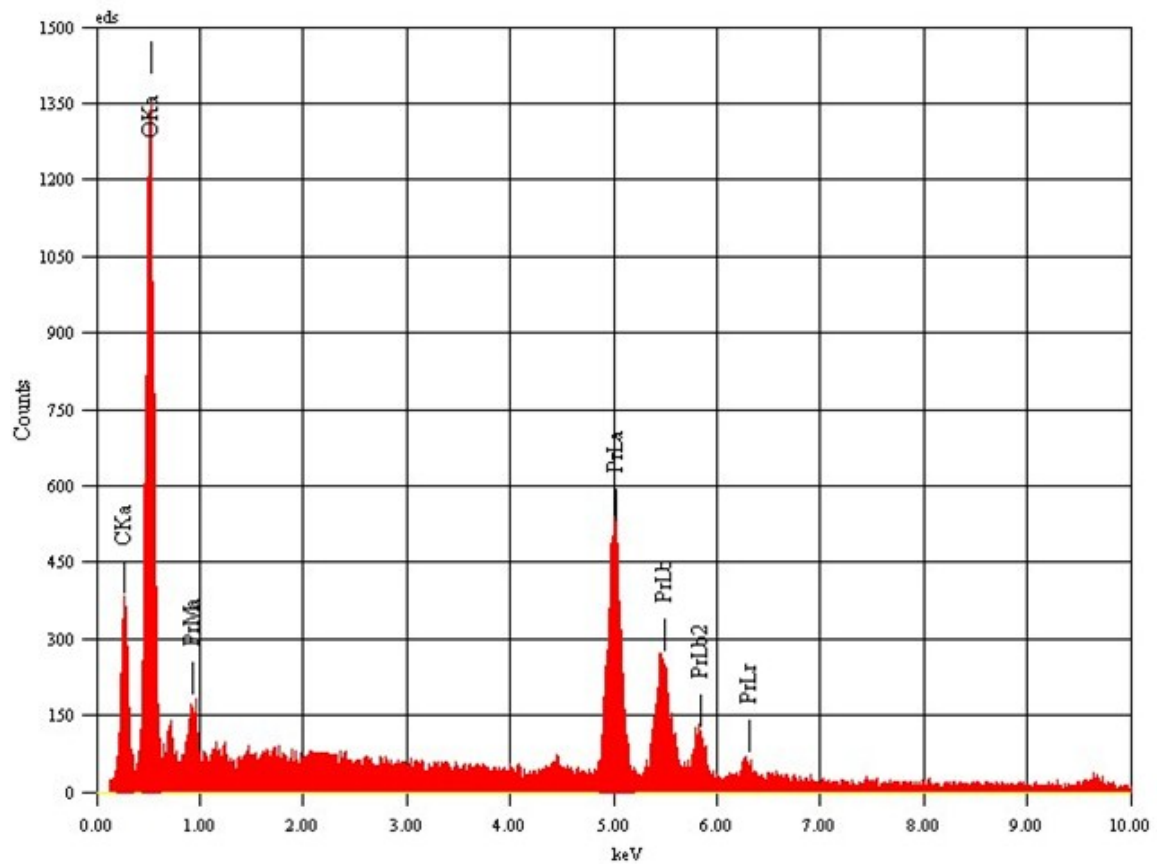

EDAX pattern showing peaks corresponding to Pr, carbon and oxygen.

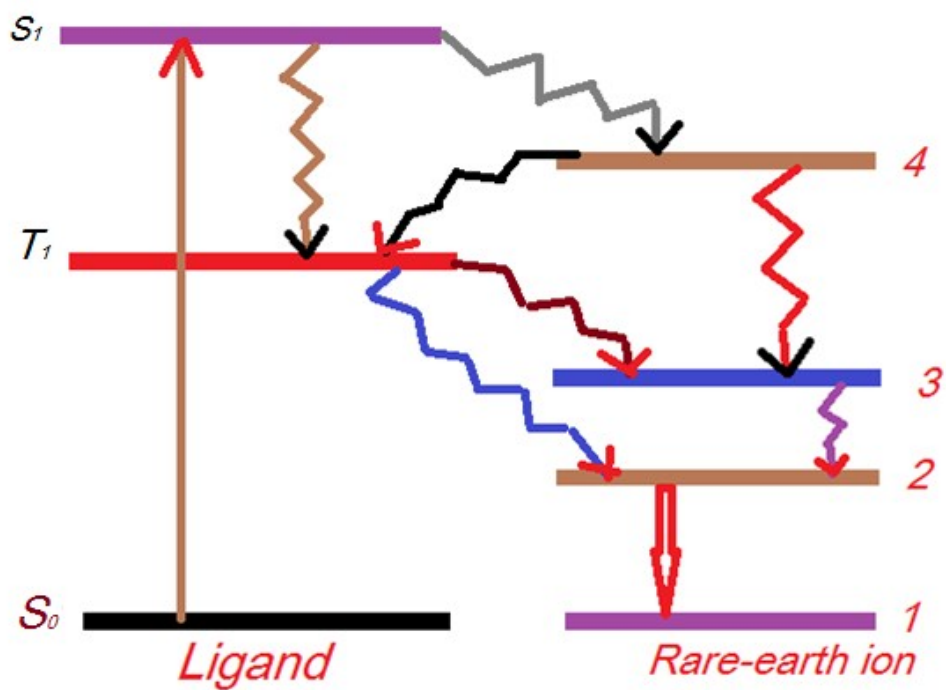

Schematic diagram depicting antenna effect in  $\text{Pr}^{3+}$  co-ordinated with organic ligand (malonic acid).
